# Supplementary material
Source: HighWire-hosted journal article supplement (https://bmjopen.bmj.com/content/9/8/e029001)
Supplement: inline-supplementary-material-1 [file inline-supplementary-material-1.pdf]

1/7

## Questionnaire: Renal Replacement Therapy in Intensive Care

Name and Address of Hospital and doctor completing the questionnaire

Who funds acute dialysis? ☐ Government ☐ private ☐ insurance company

### 1. Structural data of the entire Hospital:

Number of beds overall:

☐ 0-200 ☐ 201-400 ☐ 401-600 ☐ more than 600

☐ University Hospital

☐ Hospital of maximum medical care

☐ Hospital of basic and standard care

Number of disciplines with separate intensive care unit:

☐ 1 ☐ 2 ☐ 3 ☐ 4 ☐ 5 or more

Number of interdisciplinary intensive care units (operated by several medicinal fields):

☐ 1 ☐ 2 ☐ 3 ☐ 4 ☐ 5 or more

Number of intensive care beds in the entire hospital: \_\_\_\_\_

### 2. Structural data for your own Intensive Care unit

*(please fill in only for your own unit, not for the entire entity!):*

**Form of Intensive Care, Department:**

Anaesthesia ☐ Surgery ☐ Internal Medicine ☐ Interdisciplinary ☐

Other: ☐

Please characterise shortly the structure of your ICU:

---



---

Number of beds ☐ <5 ☐ 6-10 ☐ 11-15 ☐ more than 15

Artificial ventilation units ☐ <5 ☐ 6-10 ☐ 11-15 ☐ more than 15

Number of admissions per month ☐ <30 ☐ 31-60 ☐ 60-180 ☐ >180

Primary type of patients: ☐ Trauma ☐ Surgery ☐ Internal

☐ Interdisciplinary ☐ Other (please describe):

---



---

Rev6 translation into ENGL 3.9.10

2/7

**3. Therapy:**

Available organ replacement systems in the Intensive Care (except artificial ventilation):

☐ Renal replacement therapy

☐ None of the above

If renal replacement therapy is available continue the questionnaire

**4. Who is usually responsible for the indication of renal replacement therapy:**

a) **Department:** (*Please name only one*)

☐ Nephrologist (in house) ☐ from other hospital ☐ medical practitioner\* ☐

☐ Internal specialist\* ☐ Surgeon\* ☐ Anaesthesiologist\* ☐ Other\* (please describe):

---

---

\*Is a Nephrologist involved in the diagnosis/selection of therapy?

Yes: ☐ No: ☐

b) **Qualification:** (*multiple answers permitted*)

Registrar ☐ Specialist ☐ Senior physician ☐

Other (please describe) ☐ :

---

---

**5. Who chooses usually the renal replacement method:**

a) **Department:** (*Please name only one*)

☐ Nephrologist (in house) ☐ , from other hospital ☐ medical practitioner ☐

☐ Internal specialist ☐ Surgeon ☐ Anaesthesiologist ☐ Other (please describe):

---

---

b) **Qualification:** (*multiple answers permitted*)

Registrar ☐ Specialist ☐ Senior physician ☐

Other (please describe) ☐ :

---

---

Rev6 translation into ENGL 3.9.10

3/7

**6. Which renal replacement modalities are available:***(multiple answers permitted)*

- |                                  |                                                 |
|----------------------------------|-------------------------------------------------|
| <input type="checkbox"/> CVVH    | <input type="checkbox"/> IHD:                   |
| <input type="checkbox"/> CVVHD   | <input type="checkbox"/> prolonged IHD / SLEDD: |
| <input type="checkbox"/> CVVHDF: | <input type="checkbox"/> SCUF:                  |
| <input type="checkbox"/> PD      | <input type="checkbox"/> Other                  |

Is there a **standard method**, if yes, which: \_\_\_\_\_**7. What machines (multiple answers permitted):**

- |                                      |                                         |                                    |
|--------------------------------------|-----------------------------------------|------------------------------------|
| <input type="checkbox"/> Prisma®     | <input type="checkbox"/> Multifiltrate® | <input type="checkbox"/> Aquarius® |
| <input type="checkbox"/> Prismaflex® | <input type="checkbox"/> Genius®        | <input type="checkbox"/> BM11/25®  |
| <input type="checkbox"/> Octonova®   | <input type="checkbox"/> Other          | If other, which: _____             |

**8. Diagnosis:**

- a)
- Which criteria**
- determine usually in your department the
- beginning of renal replacement therapy
- ?

*Please evaluate the following statements:*

|                                                                                                           | Applies always |   |   | Applies never |   |
|-----------------------------------------------------------------------------------------------------------|----------------|---|---|---------------|---|
|                                                                                                           | 1              | 2 | 3 | 4             | 5 |
| We decide based on the clinical assessment of the patient                                                 |                |   |   |               |   |
| We use always definite criteria                                                                           |                |   |   |               |   |
| Following RIFLE / AKIN criteria                                                                           |                |   |   |               |   |
| Creatinine > 300µmol/L                                                                                    |                |   |   |               |   |
| Serum-Urea > 50 mmol/L                                                                                    |                |   |   |               |   |
| From a Serum-Urea > 25 mmol/L                                                                             |                |   |   |               |   |
| After ineffective use of diuretics                                                                        |                |   |   |               |   |
| Urine output < 500 ml per day                                                                             |                |   |   |               |   |
| Also because of extra renal indications                                                                   |                |   |   |               |   |
| Within 48h of ICU-Admission with AKI                                                                      |                |   |   |               |   |
| Always with septic shock                                                                                  |                |   |   |               |   |
| Only with absolute dialysis criteria (therapy-resistant hypokalaemia, acidosis, uraemia, volume overload) |                |   |   |               |   |
| With highly catecholamine dependent patients (Adrenalin > 1mg/h) and anuria as early as possible!         |                |   |   |               |   |
|                                                                                                           |                |   |   |               |   |
| We do have a SOP                                                                                          |                |   |   |               |   |
| We make decisions based upon economic aspects                                                             |                |   |   |               |   |
| With Lactic-acidosis                                                                                      |                |   |   |               |   |
| Acute renal failure with Multi Organ Failure (MOF)                                                        |                |   |   |               |   |

- b) Is treatment being delivered
- without renal indication
- ? (Dialysis or hemofiltration
- without
- renal failure)

- |                                                                |                                                          |
|----------------------------------------------------------------|----------------------------------------------------------|
| With Sepsis                                                    | <input type="checkbox"/> yes <input type="checkbox"/> no |
| With heart insufficiency                                       | <input type="checkbox"/> yes <input type="checkbox"/> no |
| Intoxication, hypercalcaemia                                   | <input type="checkbox"/> yes <input type="checkbox"/> no |
| Other (f. e. hypothermia, thermo regulation, please indicate): | <input type="checkbox"/> yes <input type="checkbox"/> no |

Rev6 translation into ENGL 3.9.10

4/7

**9. Which criteria determine the length of therapy?***Please evaluate the following statements:*

Applies always

Applies never

|                                                                                                                  | 1 | 2 | 3 | 4 | 5 |
|------------------------------------------------------------------------------------------------------------------|---|---|---|---|---|
| We decide based on the clinical assessment of the patient                                                        |   |   |   |   |   |
| We always use definite criteria                                                                                  |   |   |   |   |   |
| Following RIFLE / AKIN criteria                                                                                  |   |   |   |   |   |
| Decrease of creatinine down to the starting value                                                                |   |   |   |   |   |
| Decrease of urea down to the starting value                                                                      |   |   |   |   |   |
| From a diuresis larger than 2000 ml per day                                                                      |   |   |   |   |   |
| From a diuresis > 1000ml/d                                                                                       |   |   |   |   |   |
| From a diuresis > 1000ml/d trial of discontinuation as long as serum-urea < 25 mmol/L and no absolute indication |   |   |   |   |   |
| When clinical situation of patient improves                                                                      |   |   |   |   |   |
| We have a SOP                                                                                                    |   |   |   |   |   |
| We make decisions based upon economic aspects                                                                    |   |   |   |   |   |
| If despite renal replacement therapy a lactic acidosis continues                                                 |   |   |   |   |   |

**10. Which patients receive predominantly what kind of therapy with acute renal failure?***Please check only one per line:*

Predominantly intermittent or continuously

|                                   | 1 | 2 | 3 | 4 | 5 |
|-----------------------------------|---|---|---|---|---|
| With isolated AKI                 |   |   |   |   |   |
| With MOF                          |   |   |   |   |   |
| With Sepsis                       |   |   |   |   |   |
| With instable haemodynamics       |   |   |   |   |   |
| All patients are treated the same |   |   |   |   |   |

☐ Other (please describe):

---



---

5/7

**11. Following which criteria is therapy predominantly monitored?***(Please name only one)*clinical ☐ CEU ☐ Efficiency criteria, Kt/V ☐**a) With CVVH**

Filtrate volume/Dialysate volume:

All Patients same: 1l/h ☐ 1,5l/h ☐ 2l/h ☐ other ☐Differentiated: Ideal body weight ☐ Volume in ml per kg body weight ☐

Prescribed Dosage:

20 ml/kg/h: ☐ 25 ml/kg/h: ☐ 35 ml/kg/h: ☐Do you check the actual given dosage? Yes: ☐ No: ☐Patient weight: ☐ / estimated ☐ / ideal ☐ / actual ☐How often: daily ☐ / only in the beginning ☐☐ Other (please describe)

---



---



---

**b) With IHD or prolonged IHD / SLEDD:**

How often is therapy applied?

Daily ☐ Every other day ☐ Individual decision on a daily basis? ☐Other ☐ (please describe):

---

**12. Used buffering substance with CVVH/CVVHD/CVVHDF**Lactate ☐Lactate and Bicarbonate ☐Bicarbonate ☐Citrate ☐**13. Used anticoagulation:**

|                        | Yes                      | No                       |
|------------------------|--------------------------|--------------------------|
| Fractionated Heparin   | <input type="checkbox"/> | <input type="checkbox"/> |
| Unfractionated Heparin | <input type="checkbox"/> | <input type="checkbox"/> |

Argatroban ☐ ☐Citrate ☐ ☐Heparin/Citrate ☐ ☐No anticoagulant ☐ ☐Other ☐ Which: \_\_\_\_\_**Most often used** Anticoagulation: \_\_\_\_\_**14. Do you use regional Citrate Anticoagulation** yes ☐ no ☐

Rev6 translation into ENGL 3.9.10

6/7

If yes, in approx. what percentage of your treatments \_\_\_\_\_ %

**15. Execution:****a) CVVH with pre-dilution/post-dilution**

If applicable

Predominantly pre-dilution ☐

Predominantly post-dilution ☐

No difference ☐

Do you correct pre-dilution when dose is adjusted yes ☐ no ☐

**b) With assignment of CVVHDF what is the substitute/dialysate ratio:**

1 : 1 ☐

Substitute more than Dialysate ☐

Substitute less than Dialysate ☐

**16. Who performs the therapy hands-on?**

*(multiple answers permitted, with explanation if needed)*

**a) With CVVH / CVVHD / CVVHDF:**

-Physician ☐ \_\_\_\_\_

-Nursing staff intensive ☐ \_\_\_\_\_

-Nursing staff dialysis ☐ \_\_\_\_\_

-Technologist ☐ \_\_\_\_\_

**b) With intermittent Treatments:**

-Physician ☐ \_\_\_\_\_

-Nursing staff intensive ☐ \_\_\_\_\_

-Nursing staff dialysis ☐ \_\_\_\_\_

- Technologist ☐ \_\_\_\_\_

**17. Number of patients in intensive care with acute renal replacement therapy per year?**

☐ 10-50 ☐ 50-100 ☐ 101-200 ☐ >200

\_\_\_\_\_

**18. Percentage frequency of renal replacement therapy**

(All 3 below listed renal replacement therapies total **per year = 100%**)

Intermittent treatments:

☐0 ☐10 ☐20 ☐30 ☐40 ☐50 ☐60 ☐70 ☐80 ☐90 ☐100%

Continuous treatments:

☐0 ☐10 ☐20 ☐30 ☐40 ☐50 ☐60 ☐70 ☐80 ☐90 ☐100%

Prolonged IHD treatments:

☐0 ☐10 ☐20 ☐30 ☐40 ☐50 ☐60 ☐70 ☐80 ☐90 ☐100%

PD:

☐0 ☐10 ☐20 ☐30 ☐40 ☐50 ☐60 ☐70 ☐80 ☐90 ☐100%

**Continuous:** Number of therapy days per CRRT setup per year: \_\_\_\_\_

**Intermittent:** Number of treatments per year: \_\_\_\_\_

**Prolonged IHD:** Number of treatments per year: \_\_\_\_\_

**PD:** Number of treatments per year: \_\_\_\_\_

**19. Written down therapy standards?**

yes ☐

no ☐

☐ Comment:

\_\_\_\_\_

**20. Questionnaire filled in by (name):**

Education background:

Specialist ☐

Specialist with focus on intensive care ☐  
(Internal, surgical intensive care)

Function: Senior Physician ☐ Head Physician ☐

Comments:

\_\_\_\_\_

\_\_\_\_\_

**Thank you very much for your participation and patience.**

UCT Research Ethics Committee: Rm E52-24 OMB, GSH, Cape Town. 0214066338  
Please send all 7 completed pages to: Erika Jones: [eswjones@gmail.com](mailto:eswjones@gmail.com), fax:0865347728

Rev6 translation into ENGL 3.9.10
